# Supplementary material for: A single-array preprocessing method for estimating full-resolution raw copy numbers from all Affymetrix genotyping arrays including GenomeWideSNP 5 & 6
Source: PubMed Central journal article supplement — Bioinformatics. 2009 Jun 17;25(17):2149–56. doi: 10.1093/bioinformatics/btp371 (PMC2734319; doi:10.1093/bioinformatics/btp371), 2009-06-17
Supplement: btp371_1.pdf [file btp371_1.pdf]

Supplementary Notes #1:  
Summary of annotation data files for the Affymetrix  
GenomeWideSNP\_5 and GenomeWideSNP\_6 chip types

Henrik Bengtsson et al.

April 9, 2009

## Contents

|          |                                                        |           |
|----------|--------------------------------------------------------|-----------|
| <b>1</b> | <b>Annotation data files</b>                           | <b>2</b>  |
| 1.1      | Affymetrix annotation data . . . . .                   | 2         |
| 1.2      | Imported annotation data . . . . .                     | 4         |
| <b>2</b> | <b>Summary of annotation data</b>                      | <b>6</b>  |
| 2.1      | Affymetrix CDF data . . . . .                          | 6         |
| 2.1.1    | Unit annotations . . . . .                             | 6         |
| 2.1.2    | Probe annotations . . . . .                            | 7         |
| 2.2      | Affymetrix NetAffx data . . . . .                      | 7         |
| 2.2.1    | Genome positions . . . . .                             | 7         |
| 2.2.2    | Restriction enzymes and PCR fragment lengths . . . . . | 9         |
| <b>3</b> | <b>Multi-enzyme digestion</b>                          | <b>10</b> |

# 1 Annotation data files

Although the features on the arrays never change, their annotations might get updated as the Human Genome databases get updated. In the CRMA v2 study, we used the latest annotation data available on the Affymetrix website as of August 2008. We will list all annotation files needed by CRMA v2 for analyzing data for the GenomeWideSNP\_5 (GWS5) and the GenomeWideSNP\_6 (GWS6) chip types. First, we specify all relevant files available from Affymetrix (Tables 1 & 2). Then we specify the files compiled from the Affymetrix files for use in `aroma.affymetrix` (Tables 3 & 4).

## 1.1 Affymetrix annotation data

|              |                                                       |
|--------------|-------------------------------------------------------|
| File name    | GenomeWideSNP_5,r2.cdf                                |
| File size    | 239,670,727 bytes                                     |
| MD5 checksum | e062cb42a392dd74721d5b7cf9a286f1                      |
| Notes        | Affymetrix default chip definition file (CDF).        |
| File name    | GenomeWideSNP_5,Full,r2.cdf                           |
| File size    | 261,578,689 bytes                                     |
| MD5 checksum | 79f7a8353b4978dedbeff05a7897ff6e                      |
| Notes        | Affymetrix full chip definition file (CDF).           |
| File name    | GenomeWideSNP_5.CN_probe.tab                          |
| File size    | 43,252,969 bytes                                      |
| MD5 checksum | e661544a27163d1242ca690a486cb6b5                      |
| Notes        | Affymetrix file probe sequence file for CN probes.    |
| File name    | GenomeWideSNP_5.probe.tab                             |
| File size    | 233,706,497 bytes                                     |
| MD5 checksum | 69b66720591fde9333acf5eb4d1b3e68                      |
| Notes        | Affymetrix file probe sequence file for SNPs.         |
| File name    | GenomeWideSNP_5.cn.na26.annot.csv                     |
| File size    | 180,849,309 bytes                                     |
| MD5 checksum | ec4f6cb4b482923d73d07f1b07faefe4                      |
| Notes        | Affymetrix NetAffx v26 annotation file for CN probes. |
| File name    | GenomeWideSNP_5.na26.annot.csv                        |
| File size    | 755,337,946 bytes                                     |
| MD5 checksum | af59235b6fccada7f871257149a89215                      |
| Notes        | Affymetrix NetAffx v26 annotation file for SNPs.      |

Table 1: Details of all Affymetrix specific GenomeWideSNP\_5 annotation files used in the study.

|              |                                                       |
|--------------|-------------------------------------------------------|
| File name    | GenomeWideSNP_6.cdf                                   |
| File size    | 484,489,553 bytes                                     |
| MD5 checksum | 223f3cd9141404b2a926a40cf47d6f1a                      |
| Notes        | Affymetrix default chip definition file (CDF).        |
| File name    | GenomeWideSNP_6.Full.cdf                              |
| File size    | 493,291,745 bytes                                     |
| MD5 checksum | 3fbe0f6e7c8a346105238a3f3d10d4ec                      |
| Notes        | Affymetrix full chip definition file (CDF).           |
| File name    | GenomeWideSNP_6.CN_probe.tab                          |
| File size    | 96,968,290 bytes                                      |
| MD5 checksum | 3dc2d3178f5eafdbea9c8b6eca88a89c                      |
| Notes        | Affymetrix file probe sequence file for CN probes.    |
| File name    | GenomeWideSNP_6.probe.tab                             |
| File size    | 341,479,928 bytes                                     |
| MD5 checksum | 2037c033c09fd8f7c06bd042a77aef15                      |
| Notes        | Affymetrix file probe sequence file for SNPs.         |
| File name    | GenomeWideSNP_6.cn.na26.annot.csv                     |
| File size    | 482,222,873 bytes                                     |
| MD5 checksum | 948eb406774aa5097590debd0d667a22                      |
| Notes        | Affymetrix NetAffx v26 annotation file for CN probes. |
| File name    | GenomeWideSNP_6.na26.annot.csv                        |
| File size    | 1,628,608,540 bytes                                   |
| MD5 checksum | 323f9afa0c180c146260b5eb689d0bd2                      |
| Notes        | Affymetrix NetAffx v26 annotation file for SNPs.      |

Table 2: Details of all Affymetrix specific GenomeWideSNP\_6 annotation files used in the study.

## 1.2 Imported annotation data

Several of Affymetrix annotation files use file formats that are not intended to be used directly in a computational system, but rather be imported once. The *aroma.affymetrix* framework utilizes its own binary files that are more compact and faster to access. The contents of these are imported from the above Affymetrix annotation data files. Further details on the source files used for each compiled file is given in the file footer of each file. To download these and for further details, see the *aroma.affymetrix* webpage.

|              |                                                                                                                 |
|--------------|-----------------------------------------------------------------------------------------------------------------|
| File name    | GenomeWideSNP_5,HB20080710.acs                                                                                  |
| File size    | 121,981,027 bytes                                                                                               |
| MD5 checksum | bd0da64b09ea164082e066798774a3c5                                                                                |
| Notes        | Aroma.affymetrix probe sequence data from above Affymetrix sequence files.                                      |
| File name    | GenomeWideSNP_5,Full,r2,na26,HB20080822.ufl                                                                     |
| File size    | 3,684,511 bytes                                                                                                 |
| MD5 checksum | a533ac3ba64f36902d13bed8fe2a9a5b                                                                                |
| Notes        | Aroma.affymetrix fragment length data mapping to the full CDF. Compiled from above Affymetrix NetAffx files.    |
| File name    | GenomeWideSNP_5,Full,r2,na26,HB20080822.ugp                                                                     |
| File size    | 4,605,439 bytes                                                                                                 |
| MD5 checksum | 9827c9fad08144d6e590b87984350a26                                                                                |
| Notes        | Aroma.affymetrix genome location data mapping to the full CDF. Compiled from above Affymetrix NetAffx files.    |
| File name    | GenomeWideSNP_5,r2,na26,HB20080822.ufl                                                                          |
| File size    | 3,445,230 bytes                                                                                                 |
| MD5 checksum | 566812ef309486baf0a8496bb8a35ef5                                                                                |
| Notes        | Aroma.affymetrix fragment length data mapping to the default CDF. Compiled from above Affymetrix NetAffx files. |
| File name    | GenomeWideSNP_5,r2,na26,HB20080822.ugp                                                                          |
| File size    | 4,306,339 bytes                                                                                                 |
| MD5 checksum | 9330fdcb30b3a3b4c13cbdeb8de4ffb5                                                                                |
| Notes        | Aroma.affymetrix genome location data mapping to the default CDF. Compiled from above Affymetrix NetAffx files. |

Table 3: Details of all *aroma.affymetrix* specific GenomeWideSNP\_5 annotation files used in the study.

|              |                                                                                                                 |
|--------------|-----------------------------------------------------------------------------------------------------------------|
| File name    | GenomeWideSNP_6,HB20080710.acs                                                                                  |
| File size    | 179,217,531 bytes                                                                                               |
| MD5 checksum | f04f081e0a1900653d957a8f320744c0                                                                                |
| Notes        | Aroma.affymetrix probe sequence data from above Affymetrix sequence files.                                      |
| File name    | GenomeWideSNP_6,Full,na26,HB20080722.ufl                                                                        |
| File size    | 7,526,454 bytes                                                                                                 |
| MD5 checksum | 6f11e9bd3a7a0cb060d5fcf671b0776a                                                                                |
| Notes        | Aroma.affymetrix fragment length data mapping to the full CDF. Compiled from above Affymetrix NetAffx files.    |
| File name    | GenomeWideSNP_6,Full,na26,HB20080821.ugp                                                                        |
| File size    | 9,407,937 bytes                                                                                                 |
| MD5 checksum | 5a7bef30a458cb238ae2167aa41f5bd6                                                                                |
| Notes        | Aroma.affymetrix genome location data mapping to the full CDF. Compiled from above Affymetrix NetAffx files.    |
| File name    | GenomeWideSNP_6,na26,HB20080821.ufl                                                                             |
| File size    | 7,425,058 bytes                                                                                                 |
| MD5 checksum | 522b89d875f39832f5423e78cffba8c8                                                                                |
| Notes        | Aroma.affymetrix fragment length data mapping to the full CDF. Compiled from above Affymetrix NetAffx files.    |
| File name    | GenomeWideSNP_6,na26,HB20080821.ugp                                                                             |
| File size    | 9,281,127 bytes                                                                                                 |
| MD5 checksum | ad63ef009b44f1274f6e2a35cb951dbc                                                                                |
| Notes        | Aroma.affymetrix genome location data mapping to the default CDF. Compiled from above Affymetrix NetAffx files. |

Table 4: Details of all aroma.affymetrix specific GenomeWideSNP\_6 annotation files used in the study.

## 2 Summary of annotation data

This section provides a summary of the relevant annotation data available for the GWS5 and the GWS6 chip types. We distinguish between the annotation data available in the Chip Definition Files (CDFs) and the NetAffx files, because the former are less likely to change over time whereas the latter gets updates when the genome annotations get updated. Affymetrix' NetAffx annotation data are updated several times a year.

### 2.1 Affymetrix CDF data

Affymetrix provides one “default” and one “full” CDF for each of the GWS5 and GWS6 chip types. See Table 2 for these files. The default CDF contains a subset of the full CDF where certain SNP units have been filtered out due to homology to other regions and poor performance (private communication with Affymetrix). Tables 5 & 6 provides a summary of these CDFs. All summaries presented here and in the main paper refer to the full CDFs, unless stated otherwise.

#### 2.1.1 Unit annotations

|                            | GWS5<br>default | GWS5<br>full | GWS6<br>default | GWS6<br>full |
|----------------------------|-----------------|--------------|-----------------|--------------|
| <b>UNIT TYPES</b>          |                 |              |                 |              |
| CN units                   | 417,269         | 417,269      | 945,826         | 945,826      |
| SNPs                       | 440,794         | 500,568      | 906,600         | 931,946      |
| Subtotal                   | 858,063         | 917,847      | 1,852,426       | 1,877,772    |
| AFFX-SNPs                  | 3,022           | 3,022        | 3,022           | 3,022        |
| Subtotal                   | 861,085         | 920,859      | 1,855,448       | 1,880,794    |
| Others                     | 24              | 69           | 621             | 621          |
| Total                      | 861,109         | 920,928      | 1,856,069       | 1,881,415    |
| <b>EXCLUDED FROM FULL</b>  |                 |              |                 |              |
| CN units                   | 0               | -            | 0               | -            |
| SNPs                       | 59,744          | -            | 25,346          | -            |
| AFFX-SNPs                  | 0               | -            | 0               | -            |
| Others                     | 45              | -            | 0               | -            |
| <b>CN UNIT STRANDNESS</b>  |                 |              |                 |              |
| Sense only                 | 0               | 0            | 0               | 0            |
| Antisense only             | 417,269         | 417,269      | 945,826         | 945,826      |
| Opposite strands           | 0               | 0            | 0               | 0            |
| Both strands               | 0               | 0            | 0               | 0            |
| <b>SNP STRANDNESS</b>      |                 |              |                 |              |
| Sense only                 | 234,449         | 260,266      | 477,538         | 491,830      |
| Antisense only             | 174,549         | 194,126      | 429,062         | 440,116      |
| Opposite strands           | 31,796          | 46,176       | 0               | 0            |
| Both strands               | 0               | 0            | 0               | 0            |
| <b>AFFX-SNP STRANDNESS</b> |                 |              |                 |              |
| Sense only                 | 145             | 145          | 145             | 145          |
| Antisense only             | 129             | 129          | 129             | 129          |
| Opposite strands           | 0               | 0            | 0               | 0            |
| Both strands               | 2,748           | 2,748        | 2,748           | 2,748        |
| <b>SNP ALIGNMENT</b>       |                 |              |                 |              |
| Aligned allele pairs       | 285,984         | 308,169      | 906,600         | 931,946      |
| Non-aligned allele pairs   | 154,810         | 192,399      | 0               | 0            |
| <b>AFFX-SNP ALIGNMENT</b>  |                 |              |                 |              |
| Aligned allele pairs       | 3,022           | 3,022        | 3,022           | 3,022        |
| Non-aligned allele pairs   | 0               | 0            | 0               | 0            |

Table 5: Summary of the unit annotation available in the CDF files. All values are in counts.

## 2.1.2 Probe annotations

|                             | GWS5<br>default | GWS5<br>full | GWS6<br>default | GWS6<br>full |
|-----------------------------|-----------------|--------------|-----------------|--------------|
| <b>PROBES</b>               |                 |              |                 |              |
| CN probes                   | 417,269         | 417,269      | 945,826         | 945,826      |
| SNP probes                  | 3,526,352       | 4,004,544    | 5,660,710       | 5,833,210    |
| Subtotal                    | 3,943,621       | 4,421,813    | 6,606,536       | 6,779,036    |
| AFFX-SNP probes             | 81,504          | 81,504       | 81,504          | 81,504       |
| Subtotal                    | 4,025,125       | 4,503,317    | 6,688,040       | 6,860,540    |
| Other probes                | 178,055         | 188,239      | 32,420          | 32,420       |
| Excluded from full          | 488,376         | 0            | 172,500         | 0            |
| Total                       | 4,691,556       | 4,691,556    | 6,892,960       | 6,892,960    |
| <b>EXCLUDED FROM FULL</b>   |                 |              |                 |              |
| CN probes                   | 0               | -            | 0               | -            |
| SNP probes                  | 478,192         | -            | 172,500         | -            |
| AFFX-SNP probes             | 0               | -            | 0               | -            |
| Other probes                | 10,184          | -            | 0               | -            |
| <b>CN UNIT PROBES</b>       |                 |              |                 |              |
| CN units with 1 probe       | 417,269         | 417,269      | 945,826         | 945,826      |
| <b>SNP PROBE PAIRS</b>      |                 |              |                 |              |
| SNPs with 3 pairs           | 0               | 0            | 796,045         | 811,179      |
| SNPs with 4 pairs           | 440,794         | 500,568      | 110,555         | 120,767      |
| <b>AFFX-SNP PROBE PAIRS</b> |                 |              |                 |              |
| SNPs with 12 pairs          | 2,461           | 2,461        | 2,461           | 2,461        |
| SNPs with 20 pairs          | 561             | 561          | 561             | 561          |

Table 6: Summary on the probe annotation available in the CDF files. All values are in counts.

## 2.2 Affymetrix NetAffx data

Affymetrix makes so called NetAffx CSV files available for download. These files contain annotation data exported from their NetAffx data base. For each chip type there exists one or more NetAffx CSV files, e.g. for the GWS chip types there is one for the CN units and one for all other units on the chip. See Tables 1 & 2 for which these files are. The NetAffx data base is updated frequently and the following information is likely to get slightly outdated over time.

### 2.2.1 Genome positions

In Table 7 we summarize how many SNPs and CN loci have known annotations according to NetAffx. The genome location per chromosome is summarized in Table 8 for each of the default and the full CDF.

We do not know why the location is unknown for some loci, but from our investigation we believe it is mainly because such loci map to multiple positions in the genome. For instance, in NetAffx release 26, there is no genomic location reported for SNP\_A-4228947 (on GWS5, GWS6 and Mapping250K\_Nsp), and according to the NCBI SNP data base it (rs11261805) maps to the two locations 41,240,208 and 43,493,496 on Chr9.

Furthermore, for GWS5 the NetAffx annotation files currently available only contain data on the units in the default CDF. This is confirmed by comparing the names of the units with known locations in the default and the full GWS5.

|                                  | GWS5             |                | GWS6             |                  |
|----------------------------------|------------------|----------------|------------------|------------------|
|                                  | default<br>#loci | full*<br>#loci | default<br>#loci | full<br>#loci    |
| SNPs with known locations        | 440,094          | 440,094        | 905,386          | 929,967          |
| SNPs with unknown locations      | 700              | 60,474         | 1,214            | 1,979            |
| CN probes with known locations   | 312,384          | 312,384        | 945,806          | 945,806          |
| CN probes with unknown locations | 104,885          | 104,885        | 20               | 20               |
| AFFX-SNPs with known locations   | 3,012            | 3,012          | 3,012            | 3,012            |
| AFFX-SNPs with unknown locations | 10               | 10             | 10               | 10               |
| Total with known locations       | <b>755,490</b>   | <b>755,490</b> | <b>1,854,204</b> | <b>1,878,785</b> |
| Total with unknown locations     | 165,369          | 92,121         | 1,244            | 2,009            |
| Total                            | 861,085          | 920,859        | 1,855,448        | 1,880,794        |

Table 7: Summary of genomic location data that is available in the NetAffx files of contents in GWS5 and GWS6 with respect to unit and probe class and availability of annotation data. The effective sets of units available for CN analysis are emphasized in bold. \*See text for why the default and the full GWS5 are identical. NetAffx v26 was used for this summary.

| chromosome    | seq. length (Mbs) | GWS5             |                | GWS6             |               |
|---------------|-------------------|------------------|----------------|------------------|---------------|
|               |                   | default<br>#loci | full*<br>#loci | default<br>#loci | full<br>#loci |
| 1             | 245.2             | 58,548           | 58,548         | 144,499          | 146,401       |
| 2             | 243.3             | 63,380           | 63,380         | 151,902          | 153,663       |
| 3             | 199.4             | 53,120           | 53,120         | 126,337          | 127,766       |
| 4             | 191.6             | 50,594           | 50,594         | 118,933          | 120,296       |
| 5             | 181.0             | 48,661           | 48,661         | 114,333          | 115,672       |
| 6             | 170.7             | 47,329           | 47,329         | 111,440          | 112,825       |
| 7             | 158.4             | 39,325           | 39,325         | 99,818           | 100,996       |
| 8             | 145.9             | 41,134           | 41,134         | 97,040           | 98,277        |
| 9             | 134.5             | 31,563           | 31,563         | 81,036           | 82,168        |
| 10            | 135.5             | 39,140           | 39,140         | 92,331           | 93,592        |
| 11            | 135.0             | 37,948           | 37,948         | 88,295           | 89,525        |
| 12            | 133.5             | 36,422           | 36,422         | 86,209           | 87,321        |
| 13            | 114.2             | 28,119           | 28,119         | 65,310           | 66,067        |
| 14            | 105.3             | 23,621           | 23,621         | 56,339           | 57,103        |
| 15            | 100.1             | 20,968           | 20,968         | 52,810           | 53,556        |
| 16            | 90.0              | 20,718           | 20,718         | 53,329           | 54,182        |
| 17            | 81.7              | 17,411           | 17,411         | 46,024           | 46,632        |
| 18            | 77.8              | 21,870           | 21,870         | 51,510           | 52,093        |
| 19            | 63.8              | 10,631           | 10,631         | 29,855           | 30,299        |
| 20            | 63.6              | 17,911           | 17,911         | 43,052           | 43,628        |
| 21            | 47.0              | 10,412           | 10,412         | 24,787           | 25,111        |
| 22            | 49.5              | 9,346            | 9,346          | 24,000           | 24,484        |
| X             | 152.6             | 26,373           | 26,373         | 86,064           | 87,198        |
| Y             | 51.0              | 946              | 946            | 8,841            | 9,485         |
| Mitochondrial | 16.6kb            | -                | -              | 110              | 445           |
| total         |                   | 755,490          | 755,490        | 1,854,204        | 1,878,785     |

Table 8: Distribution of loci by chromosome for the different CDFs of GWS5 and GWS6. \*See text for why the default and the full GWS5 are identical. NetAffx v26 was used for this summary.



## 2.2.2 Restriction enzymes and PCR fragment lengths

|                                | GWS5             |                | GWS6             |               |
|--------------------------------|------------------|----------------|------------------|---------------|
|                                | default<br>#loci | full*<br>#loci | default<br>#loci | full<br>#loci |
| SNPs on NspI only              | 116,979          | 116,979        | 240,001          | 246,080       |
| SNPs on StyI only              | 74,135           | 74,135         | 154,884          | 160,899       |
| SNPs on both                   | 248,980          | 248,980        | 510,330          | 522,472       |
| SNPs with known lengths        | 440,094          | 440,094        | 905,215          | 929,451       |
| SNPs with unknown lengths      | 700              | 60,474         | 1,385            | 2,495         |
| CN probes on NspI only         | 140,099          | 140,099        | 451,191          | 451,191       |
| CN probes on StyI only         | 1,208            | 1,208          | 0                | 0             |
| CN probes on both              | 171,077          | 171,077        | 494,615          | 494,615       |
| CN probes with known lengths   | 312,384          | 312,384        | 945,806          | 945,806       |
| CN probes with unknown lengths | 104,885          | 104,885        | 20               | 20            |
| AFFX-SNPs with known lengths   | 0                | 0              | 0                | 0             |
| AFFX-SNPs with unknown lengths | 3,022            | 3,022          | 3,022            | 3,022         |
| Total with known lengths       | 752,478          | 752,478        | 1,851,021        | 1,875,257     |
| Total with unknown lengths     | 108,607          | 168,381        | 4,427            | 5,537         |
| Total                          | 861,085          | 920,859        | 1,855,448        | 1,880,794     |

Table 9: Summary of fragment-length data that is available in the NetAffx files of contents in GWS5 and GWS6 with respect to unit and probe class and availability of annotation data. \*See text for why the default and the full GWS5 are identical. NetAffx v26 was used for this summary.

### 3 Multi-enzyme digestion

For the 100K as well as the 500K SNP-only assays, DNA is prepared in two parallel processes, each digesting the DNA using a unique restriction enzyme, amplifying the fragments by PCR, and hybridizing the products to separate arrays. In the GWS assays, which like 500K use enzymes *NspI* and *StyI*, the two mixes of PCR products are no longer hybridized to separate arrays but instead hybridized in aliquot to the same array (Affymetrix Inc., 2007a,b). Consequently, SNP target DNA of PCR products originating from different digestions may hybridize to the same probe, which is something that has to be taken into account when, for instance, fitting the fragment-length normalization. For CN probes the situation is somewhat different. Affymetrix selected the CN probes from a large pool of CN probes based on their performance on copy numbers (private communication). This pilot study was conducted on a specially designed in-house chip set containing probes that are known to be on an *NspI* fragment. For this reason, some of the selected probes are exclusively on *NspI* fragments, some are by chance both on *NspI* and *StyI* fragments, but none are exclusively on *StyI* fragments. Note, when annotation for the human genome is updated, some of the probes might by chance be re-annotated to become *StyI*-only probes. We have found that it is important that the preprocessing models these differences, otherwise there is a substantial risk for getting systematic biases between SNPs and CN probes due to enzymatic mixing imbalances. See Table 9 for details on fragment-length information for the two chip types and the two enzymes.

## References

Affymetrix Inc. (2007a). *Genome-Wide Human SNP Nsp/Sty 6.0 User Guide*. Affymetrix Inc. Rev 1.

Affymetrix Inc. (2007b). *Genome-Wide Human SNP Nsp/Sty Assay 5.0*. Affymetrix Inc. Rev 2.
